# Supplementary material for: Heavy metal, organic matter, and disinfection byproduct release from drinking water pipe scales under stagnant conditions
Source: Royal Society of Chemistry journal article supplement (doi:10.1039/d2ew00537a), 2022-11-30
Supplement: d2ew00537a1.pdf [file d2ew00537a1.pdf]

## Supplementary Information

### Heavy metal, organic matter, and disinfection byproduct release from drinking water pipe scales under stagnant conditions

Kurajica, L.<sup>a</sup>; Ujević Bošnjak, M.<sup>a,\*</sup>; Kinsela, A.S.<sup>b</sup>, Štiglić, J.<sup>a</sup>; Waite T.D.<sup>b</sup>

<sup>a</sup> Croatian Institute of Public Health, Rockefeller street 7, 10000 Zagreb, Croatia.

<sup>b</sup> Water Research Centre, School of Civil and Environmental Engineering, University of New South Wales, Sydney, NSW 2052, Australia

\*Corresponding author.

Fax number: + 385 (0)1 46 83 009

E-mail address: magdalena.ujevic@hzjz.hr

Table S1. Values of water quality parameters in tap water from the three water distribution systems of interest. Note that the samples for each WDS were sampled only once.

| <b>Parameter</b>                     | <b>WDS 1</b> | <b>WDS2</b> | <b>WDS3</b> | <b>MCL*</b> |
|--------------------------------------|--------------|-------------|-------------|-------------|
| NO <sub>3</sub> <sup>-</sup> (mg/L)  | 6.1          | 2.2         | 3.7         | 50          |
| Cl <sup>-</sup> (mg/L)               | 21           | 1.7         | 101         | 250         |
| SO <sub>4</sub> <sup>2-</sup> (mg/L) | 4.5          | 6.7         | 22          | 250         |
| Na (mg/L)                            | 80           | 2.9         | 55          | 200         |
| K (mg/L)                             | 1.1          | <1          | 1.4         | /           |
| Mg (mg/L)                            | 24           | 2.1         | 8.2         | /           |
| Ca (mg/L)                            | 78           | 5.9         | 66          | /           |
| pH                                   | 7.5          | 7.3         | 7.9         | 6.5-9.5     |
| ORP (mV)                             | 495          | 431.3       | 406         | /           |
| HCO <sub>3</sub> <sup>-</sup> (mg/L) | 623          | 24.4        | 245         | /           |
| EC (μScm)                            | 776          | 62.9        | 641         | /           |
| DCAA (μg/L)                          | 1.0          | 16.2        | <1.0        | /           |
| TCAA (μg/L)                          | 2.9          | 14.6        | <0.4        | /           |
| DBAA (μg/L)                          | 0.3          | <0.4        | 2.0         | /           |
| THAA (μg/L)                          | 4.2          | 32.9        | 2.0         | 60          |
| TCM (μg/L)                           | 0.5          | <0.5        | <0.5        | /           |
| BCM (μg/L)                           | <0.5         | <0.5        | 2.8         | /           |
| TTHM (μg/L)                          | 0.5          | <0.5        | 2.8         | 100         |
| DOC (mg/L)                           | 3.3          | 1.5         | /           |             |

\*MCL= maximum contaminant level according to current Croatian legislation

Table S2. Dissolved and particulate metal concentrations in tap water samples from the three water distribution systems under investigation. Blanks, triplicates, and controls were made during the analysis to ensure the quality of results. Analytical precision, evaluated from repeated measurements of standard solutions with known concentration, was better than 10% (relative standard deviation), whereas accuracy (better than 10%) was evaluated by analysing the reference sample. Quality assurance was conducted by participation in proficiency testing for all measured parameters.

| Metal     | dissolved total |       | dissolved total |         | dissolved total |        | MCL* |
|-----------|-----------------|-------|-----------------|---------|-----------------|--------|------|
|           | WDS 1           |       | WDS 2           |         | WDS 3           |        |      |
| Li (µg/L) | 5.6             | 5.8   | 0.61            | 0.57    | 2.5             | 2.4    | /    |
| B (µg/L)  | 35              | 48    | 8.3             | 7.9     | 309             | 294    | 1000 |
| Al (µg/L) | <0.25           | 0.61  | 65.5            | 100.5   | 29.8            | 33.4   | 200  |
| V (µg/L)  | 0.04            | 0.04  | 0.4             | 0.4     | 0.7             | 0.7    | 5.0  |
| Cr (µg/L) | <0.14           | <0.14 | <0.14           | <0.14   | 0.34            | 0.32   | 50   |
| Mn (µg/L) | 0.40            | 0.35  | 0.70            | 1.5     | 0.14            | 0.22   | 50   |
| Fe (µg/L) | 5.0             | 7.6   | 29              | 50      | 4.1             | 12.1   | 200  |
| Ni (µg/L) | 0.67            | 0.70  | <0.24           | 0.25    | 0.53            | 0.51   | 20   |
| Cu (µg/L) | 0.019           | 0.019 | 0.00096         | 0.00098 | 0.0017          | 0.0071 | 2000 |
| Zn (µg/L) | 107             | 107   | 27              | 32      | 16              | 23     | 3000 |
| As (µg/L) | 2.3             | 2.3   | 0.22            | 0.24    | 0.13            | 0.12   | 10   |
| Se (µg/L) | <0.06           | <0.06 | <0.06           | <0.06   | 1.17            | 1.17   | 10   |
| Sr (µg/L) | 397             | 403   | 19              | 19      | 674             | 659    | /    |
| Mo (µg/L) | 0.73            | 0.73  | 0.30            | 0.46    | 1.1             | 1.2    | /    |
| Ba (µg/L) | 84              | 82    | 4.1             | 4.7     | 13              | 12     | 700  |
| Pb (µg/L) | 0.65            | 0.89  | 0.07            | 0.15    | 0.11            | 0.22   | 10   |

\*MCL= maximum contaminant level according to current Croatian legislation

Table S3. Excitation and emission wavelength for PARAFAC components for biofilm and every experiment (six models were generated in this research). Analyses were performed in a quartz cuvette with a path length of 1 cm. The blank solution (Milli-Q water) was subtracted from the EEM of samples. CCD gain was set at ‘medium’ and Saturation Mask Width was 10 nm. Data was corrected for inner filter effects and Rayleigh Masking (1st and 2nd order). After sample normalization, PARAFAC modeling was performed using Eigenvector Solo software (Eigenvector Research Inc., Manson, WA, USA).

|                                                                       | component       | excitation<br>(nm) | emission<br>(nm) |
|-----------------------------------------------------------------------|-----------------|--------------------|------------------|
| Pipe scale                                                            | humic-like      | 240                | 415              |
|                                                                       | tyrosine-like_1 | 240/275            | 314              |
|                                                                       | tyrosine-like_2 | 270                | 301              |
| Release<br>experiment with<br>scales from pipe 1                      | humic-like_1    | 250                | 406              |
|                                                                       | humic-like_2    | 240/295            | 410              |
|                                                                       | humic-like_3    | 260                | 442              |
|                                                                       | humic-like_4    | 240/290            | 498              |
| Release<br>experiment with<br>scales from pipe 2                      | humic-like_1    | 240/305            | 410              |
|                                                                       | humic-like_2    | 250                | 475              |
|                                                                       | tryptophan-like | 240                | 342              |
|                                                                       | tyrosine-like   | 275                | 305              |
| Release<br>experiment with<br>scales from pipe 3                      | humic-like_1    | 240/330            | 419              |
|                                                                       | tryptophan-like | 240/270            | 337              |
|                                                                       | humic-like_2    | 275                | 438              |
|                                                                       | humic-like_3    | 295                | 406              |
| Release<br>experiment with<br>scales from pipe 1<br>(addition of HAA) | humic-like_1    | 240                | 438              |
|                                                                       | humic-like_2    | 240                | 373              |
|                                                                       | tryptophan-like | 250                | 531              |
|                                                                       | humic-like_3    | 270                | 484              |
| Release<br>experiment with<br>scales from pipe 2<br>(addition of HAA) | humic-like_1    | 240                | 420              |
|                                                                       | humic-like_2    | 240                | 489              |
|                                                                       | humic-like_3    | 240                | 540              |
|                                                                       | humic-like_4    | 385                | 477              |
|                                                                       | humic-like_5    | 355                | 438              |
|                                                                       | humic-like_6    | 280                | 442              |
|                                                                       | tryptophan-like | 240                | 337              |

Table S4. Average values of measured anions, cations, pH value, ORP and electrical conductivity in the first three experiments (experiments with pipe 1, pipe 2 and pipe 3), average values of THAA and TTHM in the first three experiments. Note that THAA and TTHM were measured only at sampling points: 0, 0.08, 24 and 96 h, and average values of fluorescence intensities in the first three experiments (experiments with pipe 1, pipe 2 and pipe 3)

|                       | sampling point | NO <sub>3</sub> <sup>2-</sup> (mg/L) | Cl <sup>-</sup> (mg/L) | SO <sub>4</sub> <sup>2-</sup> (mg/L) | Na <sup>+</sup> (mg/L) | K <sub>+</sub> (mg/L) | Mg <sup>2+</sup> (mg/L) | Ca <sup>2+</sup> (mg/L) | HCO <sub>3</sub> <sup>-</sup> (mg/L) | pH value | ORP (mV) | EV (μS/cm) |
|-----------------------|----------------|--------------------------------------|------------------------|--------------------------------------|------------------------|-----------------------|-------------------------|-------------------------|--------------------------------------|----------|----------|------------|
| experiment 1 (pipe 1) | 0 h            | 6.1                                  | 21.0                   | 4.5                                  | 80.0                   | 1.1                   | 24.0                    | 78.0                    | 622.5                                | 7.5      | 495      | 776        |
|                       | 0.08 h         | 6.4                                  | 20.6                   | 5.2                                  | 80.0                   | 1.0                   | 22.5                    | 79.0                    | 577.5                                | 7.5      | 447      | 790        |
|                       | 2 h            | 6.9                                  | 22.1                   | 7.0                                  | 78.0                   | 1.1                   | 23.5                    | 75.5                    | -                                    | 7.6      | 430      | 801        |
|                       | 4 h            | 6.5                                  | 22.2                   | 7.5                                  | 80.0                   | 1.5                   | 23.5                    | 78.0                    | -                                    | 7.6      | 421      | 784        |
|                       | 24 h           | 6.9                                  | 23.1                   | 11.1                                 | 79.5                   | 1.2                   | 22.5                    | 73.5                    | -                                    | 7.6      | 436      | 775        |
|                       | 72 h           | 6.1                                  | 22.1                   | 14.5                                 | 80.0                   | 1.1                   | 21.5                    | 72.5                    | -                                    | 7.9      | 399      | 807        |
|                       | 96 h           | 7.1                                  | 22.1                   | 15.4                                 | 81.5                   | 1.3                   | 22.0                    | 72.0                    | 557.5                                | 7.9      | 403      | 786        |
| experiment 2 (pipe 2) | 0 h            | 2.2                                  | 1.7                    | 6.7                                  | 2.9                    | <1                    | 2.1                     | 5.9                     | 24.4                                 | 7.3      | 499      | 63         |
|                       | 0.08 h         | 2.0                                  | 2.9                    | 8.3                                  | 3.0                    | 1.0                   | 2.1                     | 5.9                     | 25.0                                 | 7.2      | 543      | 69         |
|                       | 2 h            | 2.0                                  | 3.4                    | 9.1                                  | 3.1                    | <1                    | 2.0                     | 5.8                     | -                                    | 7.3      | 511      | 70         |
|                       | 4 h            | 1.7                                  | 2.8                    | 9.4                                  | 3.0                    | 1.0                   | 2.1                     | 6.3                     | -                                    | 7.2      | 511      | 70         |
|                       | 24 h           | 1.6                                  | 3.0                    | 10.8                                 | 3.5                    | 1.4                   | 2.4                     | 7.6                     | -                                    | 7.2      | 501      | 77         |
|                       | 72 h           | 3.2                                  | 4.0                    | 12.7                                 | 3.5                    | 1.6                   | 2.2                     | 7.6                     | -                                    | 7.4      | 507      | 82         |
|                       | 96 h           | 1.6                                  | 3.9                    | 14.3                                 | 3.2                    | 1.7                   | 2.2                     | 7.7                     | 28.0                                 | 7.4      | 471      | 81         |
| experiment 3 (pipe 3) | 0 h            | 3.7                                  | 101.0                  | 22.0                                 | 55.0                   | 1.4                   | 8.2                     | 66.0                    | 244.9                                | 7.9      | 406      | 641        |
|                       | 0.08 h         | 3.1                                  | 108.0                  | 23.6                                 | 53.0                   | 1.4                   | 8.2                     | 66.0                    | 237.6                                | 7.7      | 427      | 657        |
|                       | 2 h            | 2.8                                  | 109.0                  | 23.7                                 | 53.7                   | 1.4                   | 8.3                     | 75.3                    | -                                    | 7.7      | 419      | 662        |
|                       | 4 h            | 2.4                                  | 121.0                  | 26.7                                 | 60.0                   | 1.6                   | 8.9                     | 73.0                    | -                                    | 8.0      | 432      | 678        |
|                       | 24 h           | 2.2                                  | 112.5                  | 26.8                                 | 56.0                   | 1.9                   | 8.5                     | 71.0                    | -                                    | 7.8      | 462      | 680        |
|                       | 72 h           | 2.4                                  | 112.0                  | 26.8                                 | 56.5                   | 1.5                   | 8.7                     | 73.5                    | -                                    | 7.9      | 405      | 691        |
|                       | 96 h           | 2.0                                  | 108.0                  | 26.6                                 | 55.0                   | 1.5                   | 8.4                     | 71.0                    | 221.2                                | 8.0      | 433      | 683        |

|                       | sampling point | THAA (μg/L) | TTHM (μg/L) |
|-----------------------|----------------|-------------|-------------|
| experiment 1 (pipe 1) | 0 h            | 4.2         | 0.5         |
|                       | 0.08 h         | 3.2         | <0.5        |
|                       | 24 h           | 4.1         | 0.7         |
|                       | 96 h           | 3.4         | <0.5        |
| experiment 2 (pipe 2) | 0 h            | 32.9        | <0.5        |
|                       | 0.08 h         | 35.3        | <0.5        |
|                       | 24 h           | 36.2        | <0.5        |
|                       | 96 h           | 35.9        | <0.5        |
| experiment 3 (pipe 3) | 0 h            | 2.0         | 2.8         |
|                       | 0.08 h         | 2.0         | 1.9         |
|                       | 24 h           | 2.1         | 1.8         |
|                       | 96 h           | 2.0         | 1.6         |

| Experiment 1     |                     |                      |                      |                      |
|------------------|---------------------|----------------------|----------------------|----------------------|
| Exposure time, h | humic-like1<br>(RU) | humic-like 2<br>(RU) | humic-like 3<br>(RU) | humic-like 4<br>(RU) |
| 0                | 386.0               | 205.5                | 185.0                | 138.8                |
| 0.08             | 396.7               | 209.6                | 189.3                | 142.3                |
| 2                | 395.4               | 211.1                | 188.0                | 141.1                |
| 4                | 407.2               | 219.4                | 191.7                | 141.8                |
| 24               | 394.6               | 211.7                | 188.6                | 139.7                |
| 72               | 374.4               | 202.2                | 186.0                | 134.5                |
| 96               | 367.0               | 202.3                | 179.0                | 131.9                |

| Experiment 2     |                     |                      |                         |                       |
|------------------|---------------------|----------------------|-------------------------|-----------------------|
| Exposure time, h | humic-lke 1<br>(RU) | humic-like 2<br>(RU) | tryprophan-like<br>(RU) | tyrosine-like<br>(RU) |
| 0                | 59.2                | 46.1                 | 12.0                    | 0.0                   |
| 0.08             | 116.7               | 88.6                 | 76.4                    | 43.3                  |
| 2                | 118.1               | 91.0                 | 79.3                    | 44.9                  |
| 4                | 74.5                | 57.0                 | 43.9                    | 12.1                  |
| 24               | 66.3                | 46.2                 | 36.4                    | 8.1                   |
| 72               | 80.4                | 51.2                 | 46.4                    | 14.2                  |
| 96               | 56.7                | 38.9                 | 23.5                    | 5.7                   |

| Experiment 3     |                      |                         |                      |                      |
|------------------|----------------------|-------------------------|----------------------|----------------------|
| Exposure time, h | humic-like 1<br>(RU) | tryptophan-like<br>(RU) | humic-like 2<br>(RU) | humic-like 3<br>(RU) |
| 0                | 0.0                  | 0.0                     | 0.0                  | 0.0                  |
| 0.08             | 61.4                 | 43.4                    | 7.9                  | 104.8                |
| 2                | 154.2                | 114.3                   | 10.8                 | 56.9                 |
| 4                | 60.0                 | 36.7                    | 146.2                | 16.7                 |
| 24               | 88.8                 | 84.2                    | 7.6                  | 43.2                 |
| 72               | 7.0                  | 6.5                     | 2.2                  | 18.1                 |
| 96               | 4.5                  | 7.5                     | 2.1                  | 22.5                 |

Table S5. Spearman's correlation coefficients for measured parameters calculated from data from experiments with pipe 1, pipe 2 and pipe 3. Humic-like components were summed for

each experiments, as well as tyrosine-like and tryptophan-like components into protein-like component. Marked correlations are significant at  $p < 0.05$ .

|                               | NO <sub>3</sub> <sup>-</sup> | Cl <sup>-</sup> | SO <sub>4</sub> <sup>2-</sup> | Na <sup>+</sup> | K <sup>+</sup> | Mg <sup>2+</sup> | Ca <sup>2+</sup> | pH   | ORP  | EC   | As <sub>diss</sub> | As <sub>tot</sub> | Fe <sub>diss</sub> | Fe <sub>tot</sub> | Al <sub>diss</sub> | Al <sub>tot</sub> | Mn <sub>diss</sub> | Mn <sub>tot</sub> | Pb <sub>diss</sub> | Pb <sub>tot</sub> | Zn <sub>diss</sub> | Zn <sub>tot</sub> | humic-like | protein-like |
|-------------------------------|------------------------------|-----------------|-------------------------------|-----------------|----------------|------------------|------------------|------|------|------|--------------------|-------------------|--------------------|-------------------|--------------------|-------------------|--------------------|-------------------|--------------------|-------------------|--------------------|-------------------|------------|--------------|
| NO <sub>3</sub> <sup>-</sup>  | 1.0                          | 0.3             | -0.2                          | 0.8             | 0.1            | 0.8              | 0.7              | 0.5  | -0.5 | 0.8  | 0.5                | 0.5               | -0.2               | 0.5               | -0.4               | 0.4               | -0.3               | -0.2              | 0.8                | 0.8               | -0.7               | -0.7              | 0.7        | -0.8         |
| Cl <sup>-</sup>               | 0.3                          | 1.0             | 0.7                           | 0.5             | 0.8            | 0.5              | 0.5              | 0.8  | -0.7 | 0.5  | -0.5               | -0.5              | -0.7               | 0.0               | -0.7               | -0.4              | 0.6                | 0.6               | 0.0                | 0.0               | -0.8               | -0.8              | 0.1        | -0.1         |
| SO <sub>4</sub> <sup>2-</sup> | -0.2                         | 0.7             | 1.0                           | 0.0             | 0.7            | -0.1             | 0.0              | 0.6  | -0.5 | 0.0  | -0.8               | -0.7              | -0.5               | -0.1              | -0.3               | -0.5              | 0.8                | 0.9               | -0.5               | -0.4              | -0.4               | -0.4              | -0.5       | 0.3          |
| Na <sup>+</sup>               | 0.8                          | 0.5             | 0.0                           | 1.0             | 0.3            | 0.9              | 0.8              | 0.7  | -0.5 | 1.0  | 0.4                | 0.4               | -0.4               | 0.5               | -0.7               | 0.2               | 0.0                | 0.1               | 0.8                | 0.8               | -0.8               | -0.8              | 0.7        | -0.8         |
| K <sup>+</sup>                | 0.1                          | 0.8             | 0.7                           | 0.3             | 1.0            | 0.3              | 0.4              | 0.5  | -0.5 | 0.3  | -0.6               | -0.5              | -0.5               | 0.0               | -0.6               | -0.5              | 0.6                | 0.6               | -0.2               | -0.1              | -0.6               | -0.6              | -0.1       | 0.0          |
| Mg <sup>2+</sup>              | 0.8                          | 0.5             | -0.1                          | 0.9             | 0.3            | 1.0              | 0.9              | 0.6  | -0.5 | 0.9  | 0.4                | 0.4               | -0.5               | 0.4               | -0.7               | 0.1               | -0.1               | 0.0               | 0.8                | 0.8               | -0.8               | -0.8              | 0.7        | -0.8         |
| Ca <sup>2+</sup>              | 0.7                          | 0.5             | 0.0                           | 0.8             | 0.4            | 0.9              | 1.0              | 0.5  | -0.6 | 0.9  | 0.3                | 0.3               | -0.5               | 0.4               | -0.7               | 0.1               | 0.0                | 0.0               | 0.7                | 0.7               | -0.8               | -0.8              | 0.6        | -0.6         |
| pH                            | 0.5                          | 0.8             | 0.6                           | 0.7             | 0.5            | 0.6              | 0.5              | 1.0  | -0.8 | 0.7  | -0.2               | -0.1              | -0.7               | 0.2               | -0.6               | -0.1              | 0.4                | 0.5               | 0.2                | 0.4               | -0.8               | -0.8              | 0.1        | -0.5         |
| ORP                           | -0.5                         | -0.7            | -0.5                          | -0.5            | -0.5           | -0.5             | -0.6             | -0.8 | 1.0  | -0.5 | 0.3                | 0.2               | 0.6                | -0.2              | 0.5                | 0.0               | -0.3               | -0.3              | -0.1               | -0.3              | 0.8                | 0.8               | -0.1       | 0.4          |
| EC                            | 0.8                          | 0.5             | 0.0                           | 1.0             | 0.3            | 0.9              | 0.9              | 0.7  | -0.5 | 1.0  | 0.4                | 0.4               | -0.5               | 0.5               | -0.7               | 0.2               | 0.1                | 0.1               | 0.8                | 0.8               | -0.8               | -0.8              | 0.6        | -0.8         |
| As <sub>diss</sub>            | 0.5                          | -0.5            | -0.8                          | 0.4             | -0.6           | 0.4              | 0.3              | -0.2 | 0.3  | 0.4  | 1.0                | 0.9               | 0.3                | 0.4               | 0.0                | 0.7               | -0.7               | -0.6              | 0.9                | 0.8               | 0.0                | 0.0               | 0.7        | -0.6         |
| As <sub>tot</sub>             | 0.5                          | -0.5            | -0.7                          | 0.4             | -0.5           | 0.4              | 0.3              | -0.1 | 0.2  | 0.4  | 0.9                | 1.0               | 0.4                | 0.6               | 0.2                | 0.8               | -0.6               | -0.5              | 0.8                | 0.9               | 0.0                | 0.0               | 0.7        | -0.6         |
| Fe <sub>diss</sub>            | -0.2                         | -0.7            | -0.5                          | -0.4            | -0.5           | -0.5             | -0.5             | -0.7 | 0.6  | -0.5 | 0.3                | 0.4               | 1.0                | 0.3               | 0.8                | 0.5               | -0.3               | -0.3              | -0.1               | 0.0               | 0.7                | 0.7               | 0.1        | 0.3          |
| Fe <sub>tot</sub>             | 0.5                          | 0.0             | -0.1                          | 0.5             | 0.0            | 0.4              | 0.4              | 0.2  | -0.2 | 0.5  | 0.4                | 0.6               | 0.3                | 1.0               | 0.0                | 0.8               | 0.0                | 0.1               | 0.5                | 0.7               | -0.3               | -0.3              | 0.7        | -0.3         |
| Al <sub>diss</sub>            | -0.4                         | -0.7            | -0.3                          | -0.7            | -0.6           | -0.7             | -0.7             | -0.6 | 0.5  | -0.7 | 0.0                | 0.2               | 0.8                | 0.0               | 1.0                | 0.4               | -0.3               | -0.3              | -0.4               | -0.3              | 0.8                | 0.8               | -0.3       | 0.4          |
| Al <sub>tot</sub>             | 0.4                          | -0.4            | -0.5                          | 0.2             | -0.5           | 0.1              | 0.1              | -0.1 | 0.0  | 0.2  | 0.7                | 0.8               | 0.5                | 0.8               | 0.4                | 1.0               | -0.4               | -0.4              | 0.5                | 0.7               | 0.1                | 0.1               | 0.5        | -0.4         |
| Mn <sub>diss</sub>            | -0.3                         | 0.6             | 0.8                           | 0.0             | 0.6            | -0.1             | 0.0              | 0.4  | -0.3 | 0.1  | -0.7               | -0.6              | -0.3               | 0.0               | -0.3               | -0.4              | 1.0                | 1.0               | -0.5               | -0.3              | -0.3               | -0.3              | -0.3       | 0.3          |
| Mn <sub>tot</sub>             | -0.2                         | 0.6             | 0.9                           | 0.1             | 0.6            | 0.0              | 0.0              | 0.5  | -0.3 | 0.1  | -0.6               | -0.5              | -0.3               | 0.1               | -0.3               | -0.4              | 1.0                | 1.0               | -0.4               | -0.3              | -0.3               | -0.3              | -0.2       | 0.3          |
| Pb <sub>diss</sub>            | 0.8                          | 0.0             | -0.5                          | 0.8             | -0.2           | 0.8              | 0.7              | 0.2  | -0.1 | 0.8  | 0.9                | 0.8               | -0.1               | 0.5               | -0.4               | 0.5               | -0.5               | -0.4              | 1.0                | 0.9               | -0.5               | -0.5              | 0.8        | -0.8         |
| Pb <sub>tot</sub>             | 0.8                          | 0.0             | -0.4                          | 0.8             | -0.1           | 0.8              | 0.7              | 0.4  | -0.3 | 0.8  | 0.8                | 0.9               | 0.0                | 0.7               | -0.3               | 0.7               | -0.3               | -0.3              | 0.9                | 1.0               | -0.5               | -0.5              | 0.8        | -0.8         |
| Zn <sub>diss</sub>            | -0.7                         | -0.8            | -0.4                          | -0.8            | -0.6           | -0.8             | -0.8             | -0.8 | 0.8  | -0.8 | 0.0                | 0.0               | 0.7                | -0.3              | 0.8                | 0.1               | -0.3               | -0.3              | -0.5               | -0.5              | 1.0                | 1.0               | -0.4       | 0.6          |
| Zn <sub>tot</sub>             | -0.7                         | -0.8            | -0.4                          | -0.8            | -0.6           | -0.8             | -0.8             | -0.8 | 0.8  | -0.8 | 0.0                | 0.0               | 0.7                | -0.3              | 0.8                | 0.1               | -0.3               | -0.3              | -0.5               | -0.5              | 1.0                | 1.0               | -0.4       | 0.6          |
| humic-like                    | 0.7                          | 0.1             | -0.5                          | 0.7             | -0.1           | 0.7              | 0.6              | 0.1  | -0.1 | 0.6  | 0.7                | 0.7               | 0.1                | 0.7               | -0.3               | 0.5               | -0.3               | -0.2              | 0.8                | 0.8               | -0.4               | -0.4              | 1.0        | -0.4         |
| protein-like                  | -0.8                         | -0.1            | 0.3                           | -0.8            | 0.0            | -0.8             | -0.6             | -0.5 | 0.4  | -0.8 | -0.6               | -0.6              | 0.3                | -0.3              | 0.4                | -0.4              | 0.3                | 0.3               | -0.8               | -0.8              | 0.6                | 0.6               | -0.4       | 1.0          |



Table S6. pH value and DOC in the experiments with added humic acid.

|                        |        | pH value | DOC<br>(mg/L) |                        |        | pH<br>value | DOC<br>(mg/L) |
|------------------------|--------|----------|---------------|------------------------|--------|-------------|---------------|
| pipe 1 (HA=2<br>mg/L)  | 0 h    | 8.3      | -             | pipe 2 (HA=2<br>mg/L)  | 0 h    | 7.6         | 1.6           |
|                        | 0.08 h | 7.8      | -             |                        | 0.08 h | 7.3         | 1.8           |
|                        | 4 h    | 7.7      | -             |                        | 4 h    | 6.6         | -             |
|                        | 24 h   | 7.8      | -             |                        | 24 h   | 6.6         | -             |
|                        | 48 h   | 8.0      | -             |                        | 72 h   | 6.7         | -             |
|                        | 72 h   | 8.2      | -             |                        | 96 h   | 6.7         | -             |
|                        | 96 h   | 8.4      | -             |                        | 240 h  | 6.8         | 1.3           |
| pipe 1 (HA=5<br>mg/L)  | 0 h    | 8.3      | -             | pipe 2 (HA=5<br>mg/L)  | 0 h    | 7.6         | 1.6           |
|                        | 0.08 h | 7.9      | -             |                        | 0.08 h | 7.1         | 2.1           |
|                        | 4 h    | 7.8      | -             |                        | 4 h    | 4.7         | -             |
|                        | 24 h   | 7.8      | -             |                        | 24 h   | 6.7         | -             |
|                        | 48 h   | 7.9      | -             |                        | 72 h   | 6.9         | -             |
|                        | 72 h   | 8.0      | -             |                        | 96 h   | 7.0         | -             |
|                        | 96 h   | 8.2      | -             |                        | 240 h  | 6.9         | 1.5           |
| pipe 1 (HA=10<br>mg/L) | 0 h    | 8.3      | -             | pipe 2 (HA=10<br>mg/L) | 0 h    | 7.6         | 1.6           |
|                        | 0.08 h | 7.8      | -             |                        | 0.08 h | 7.2         | 3.5           |
|                        | 4 h    | 7.8      | -             |                        | 4 h    | 6.9         | -             |
|                        | 24 h   | 7.8      | -             |                        | 24 h   | 6.8         | -             |
|                        | 48 h   | 7.9      | -             |                        | 72 h   | 6.9         | -             |
|                        | 72 h   | 8.1      | -             |                        | 96 h   | 7.0         | -             |
|                        | 96 h   | 8.2      | -             |                        | 240 h  | 6.9         | 1.6           |

Table S7. Percentage of released metals from the deposits during the experiments with tap water.

| <b>Metal</b>      | <b>pipe 1<br/>% released</b> | <b>pipe 2<br/>% released</b> | <b>pipe 3<br/>% released</b> |
|-------------------|------------------------------|------------------------------|------------------------------|
| <b>Fe (mg/kg)</b> | 0.19                         | 0.05                         | 0.06                         |
| <b>As (mg/kg)</b> | 1.2                          | 1.1                          | 0.4                          |
| <b>Mn (mg/kg)</b> | 3.9                          | 4.6                          | 12.7                         |
| <b>Al (mg/kg)</b> | 6.2                          | 1.0                          | 3.6                          |
| <b>Zn (mg/kg)</b> | 1.3                          | 12.9                         | 2.8                          |
| <b>V (mg/kg)</b>  | 2.2                          | 0.5                          | 0.8                          |
| <b>Cr (mg/kg)</b> | 1.8                          | 0.2                          | 0.6                          |
| <b>Co (mg/kg)</b> | 6.2                          | 2.1                          | 5.5                          |
| <b>Ni (mg/kg)</b> | 19.4                         | 5.5                          | 10.6                         |
| <b>Cu (mg/kg)</b> | 20.5                         | 3.0                          | 0.7                          |
| <b>Se (mg/kg)</b> | 9.4                          | 10.8                         | 44.4                         |
| <b>Mo (mg/kg)</b> | 2.0                          | 1.2                          | 1.7                          |
| <b>Cd (mg/kg)</b> | 4.0                          | 13.1                         | 11.9                         |
| <b>Sn (mg/kg)</b> | /                            | /                            | /                            |
| <b>Sb (mg/kg)</b> | 3.1                          | 3.8                          | 1.0                          |
| <b>Ba (mg/kg)</b> | 48.3                         | 8.3                          | 4.2                          |
| <b>Pb (mg/kg)</b> | 2.1                          | 1.4                          | 0.4                          |
| <b>U (mg/kg)</b>  | 2.1                          | /                            | 3.1                          |

Table S8. Percentage of released metal under different HA concentrations in the experiment with pipe 2.

| <b>Metal</b>      | <b>% released<br/>(without HA)</b> | <b>% released<br/>(HA=2 mg/L)</b> | <b>% released<br/>(HA=5 mg/L)</b> | <b>% released<br/>(HA=10 mg/L)</b> |
|-------------------|------------------------------------|-----------------------------------|-----------------------------------|------------------------------------|
| <b>Fe (mg/kg)</b> | 0.05                               | 0.4                               | 0.5                               | 0.8                                |
| <b>As (mg/kg)</b> | 1.1                                | 2.1                               | 3.8                               | 3.4                                |
| <b>Mn (mg/kg)</b> | 4.6                                | 7.3                               | 7.1                               | 7.9                                |
| <b>Al (mg/kg)</b> | 1.0                                | 1.7                               | 1.4                               | 1.8                                |
| <b>Zn (mg/kg)</b> | 12.9                               | 23.8                              | 21.4                              | 22.8                               |
| <b>V (mg/kg)</b>  | 0.5                                | 1.3                               | 3.0                               | 4.1                                |
| <b>Cr (mg/kg)</b> | 0.2                                | 2.6                               | 3.2                               | 6.4                                |
| <b>Co (mg/kg)</b> | 2.1                                | 3.5                               | 4.3                               | 5.6                                |
| <b>Ni (mg/kg)</b> | 5.5                                | 17.0                              | 12.9                              | 18.1                               |
| <b>Cu (mg/kg)</b> | 3.0                                | 7.2                               | 6.3                               | 12.7                               |
| <b>Se (mg/kg)</b> | 10.8                               | 19.9                              | 29.1                              | 29.6                               |
| <b>Mo (mg/kg)</b> | 1.2                                | 10.3                              | 15.9                              | 8.3                                |
| <b>Cd (mg/kg)</b> | 13.1                               | 37.7                              | 28.2                              | 33.6                               |
| <b>Sn (mg/kg)</b> | /                                  | /                                 | /                                 | /                                  |
| <b>Sb (mg/kg)</b> | 3.8                                | 9.6                               | 9.4                               | 11.6                               |
| <b>Ba (mg/kg)</b> | 8.3                                | 19.4                              | 19.4                              | 88.4                               |
| <b>Pb (mg/kg)</b> | 1.4                                | 8.2                               | 5.8                               | 6.6                                |
| <b>U (mg/kg)</b>  | /                                  | 5.9                               | 7.0                               | 12.6                               |

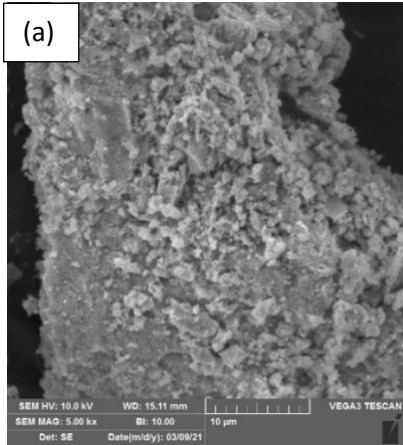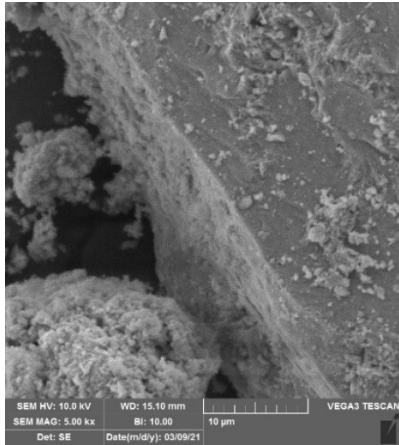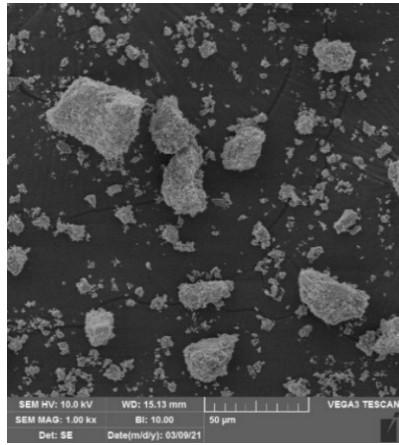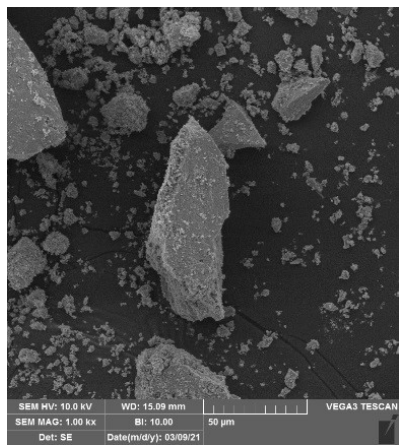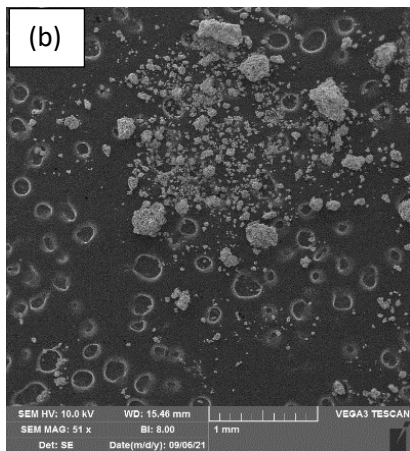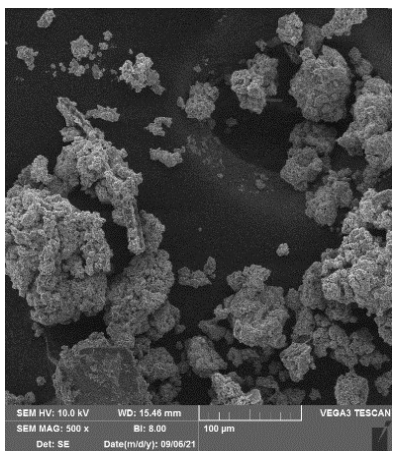

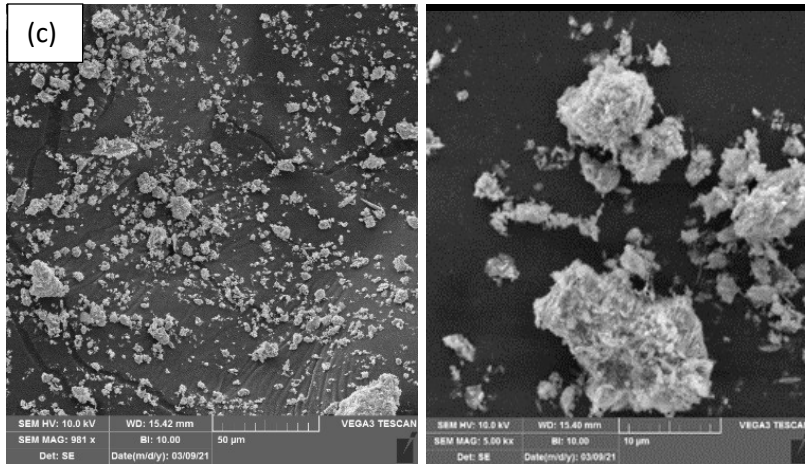

Figure S1. Additional SEM images of pipe scale 1 (a), pipe scale 2 (b) and pipe scale 3(c). Note the different magnifications used.

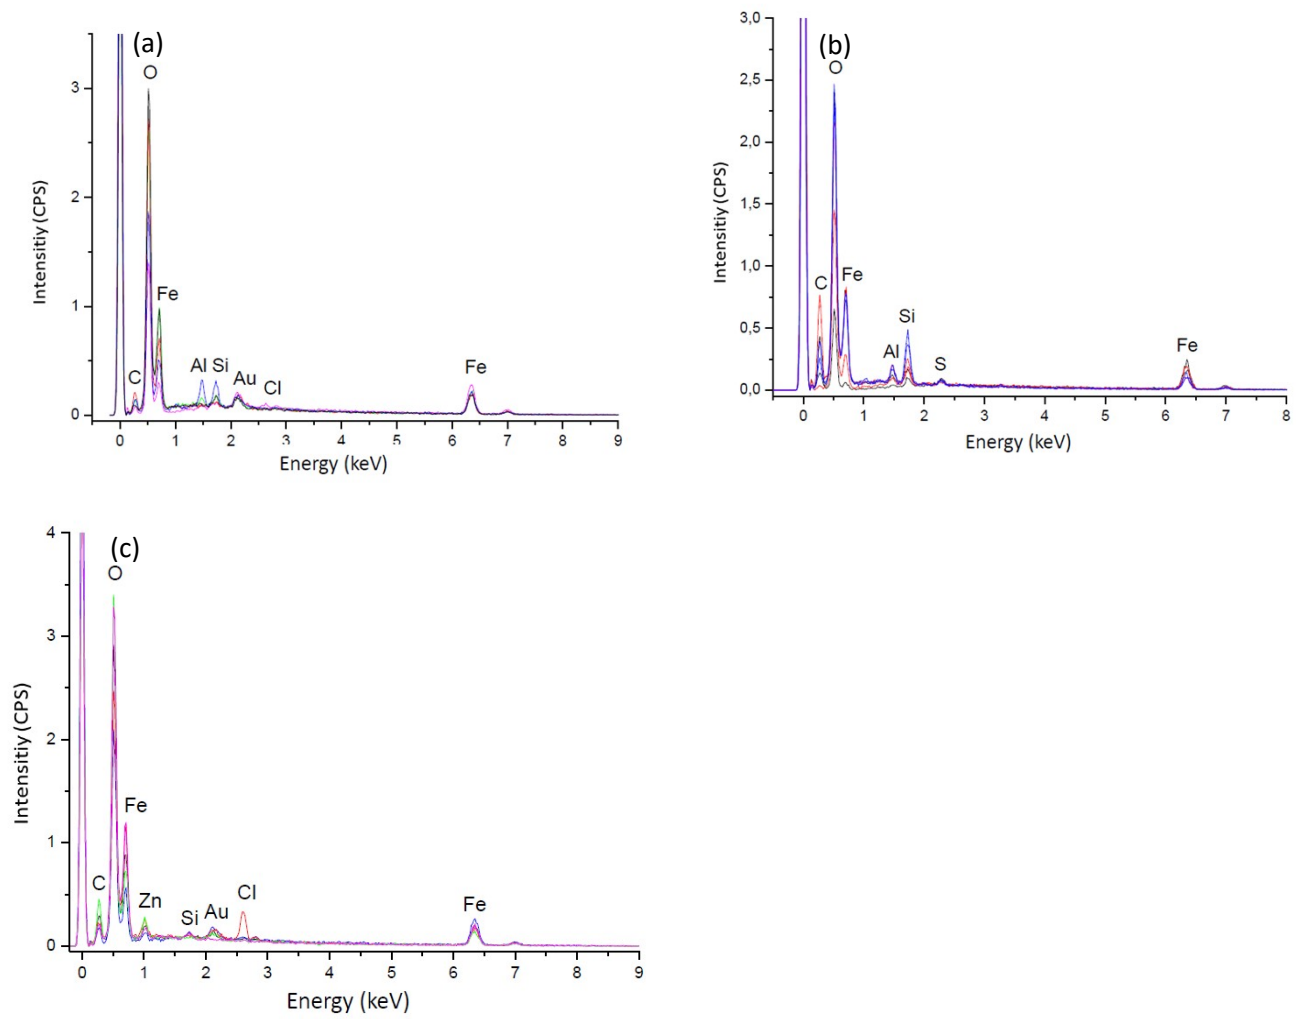

Figure S2. EDS spectra of particles from (a) pipe 1, (b) pipe 2 and (c) pipe 3.

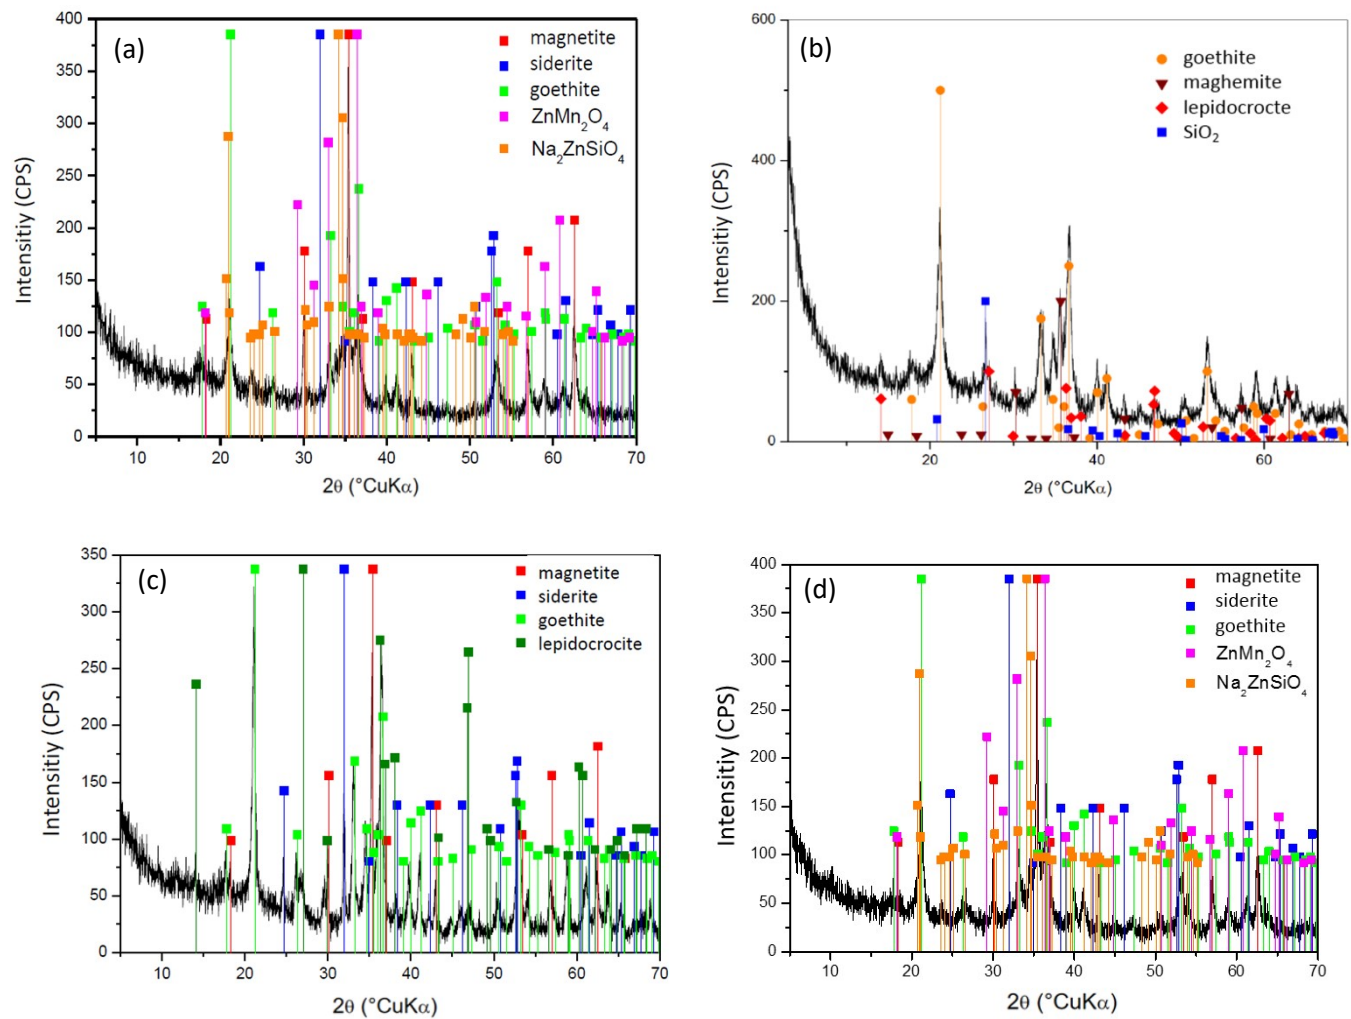

Figure S3. Diffractograms of samples from (a) pipe 1, (b) pipe 2 and (c) pipe 3. Figure S3d shows diffractogram of sample from pipe 1 after the experiment. Data base ICDD PDF-2 (The International Centre for Diffraction Data Powder Diffraction, 2003) was used to determine phase composition of samples.

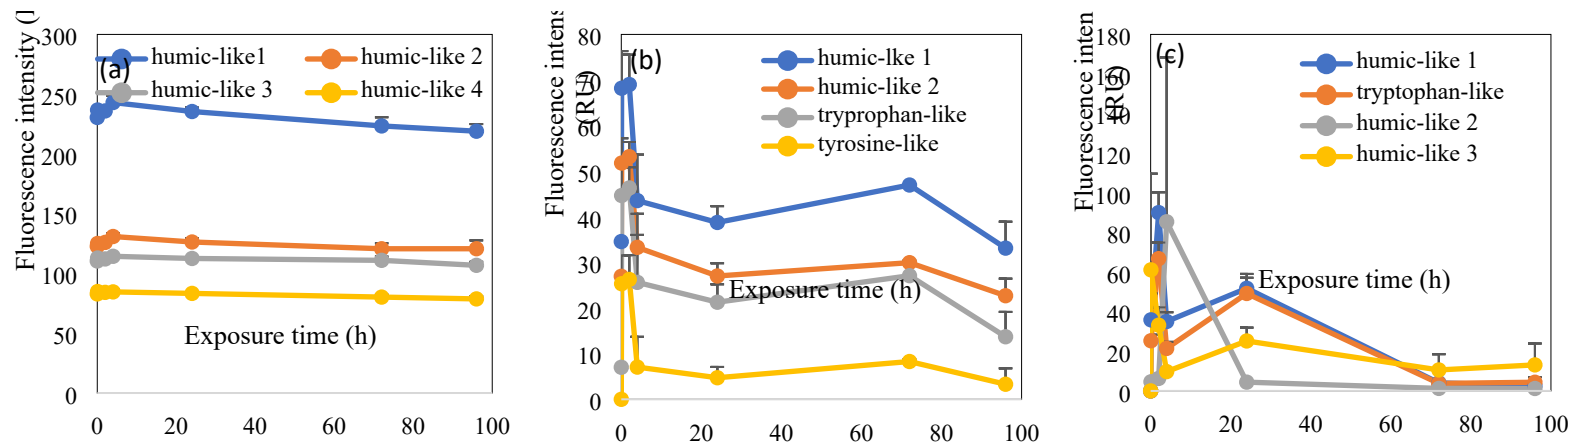

Figure S4. Time profiles of the OM components in experiments with scale from (a) pipe 1, (b) pipe 2 and (c) pipe 3.



pipe 1

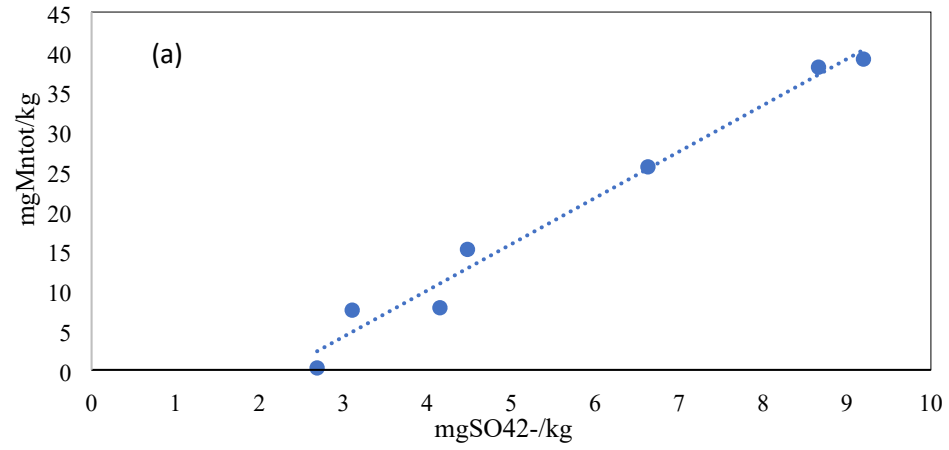

pipe 2

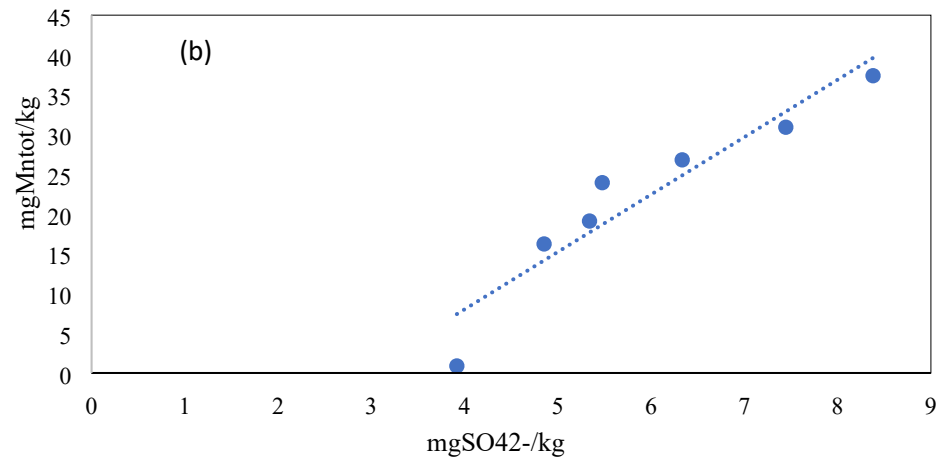

pipe 3

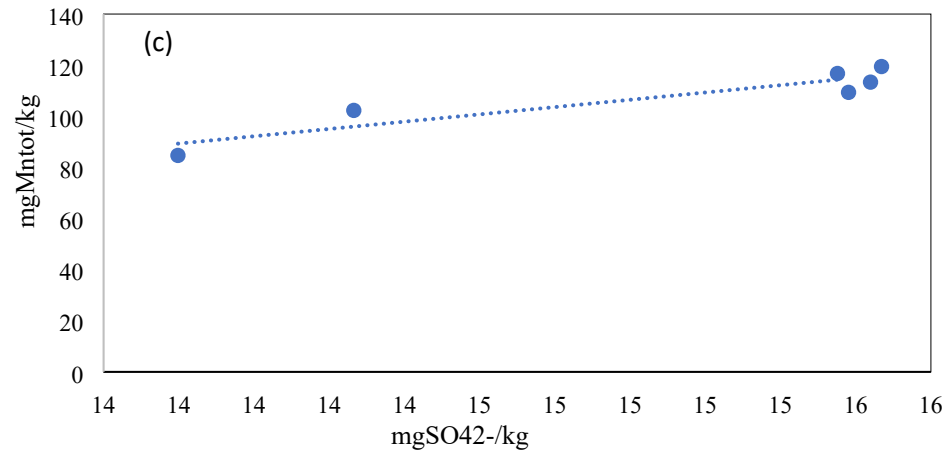

pipe 2

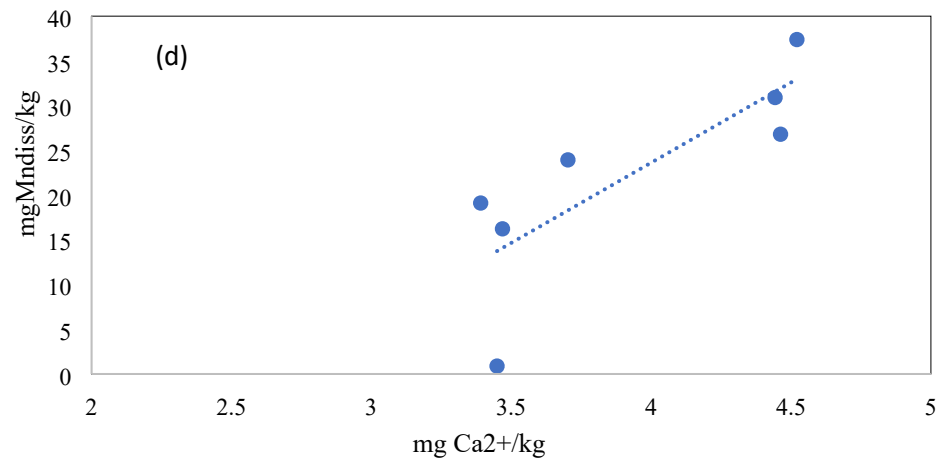

Figure S5. The linear co-release of Mn and sulfate in (a) pipe 1, (b) pipe 2 and (c) pipe 3 and (d) Mn and calcium in pipe 2.

pipe 1

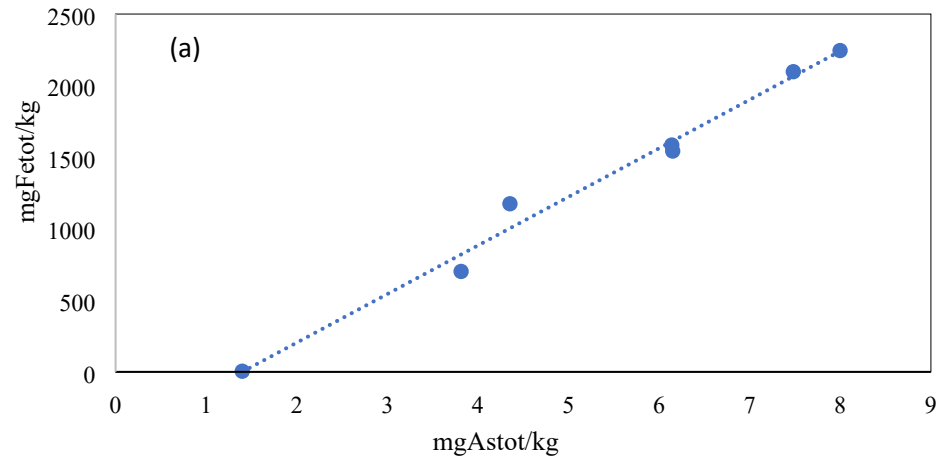

pipe 1

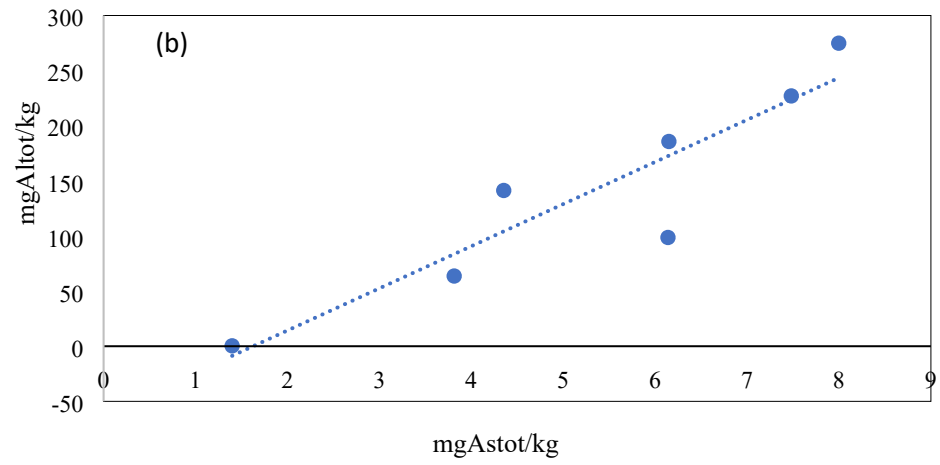

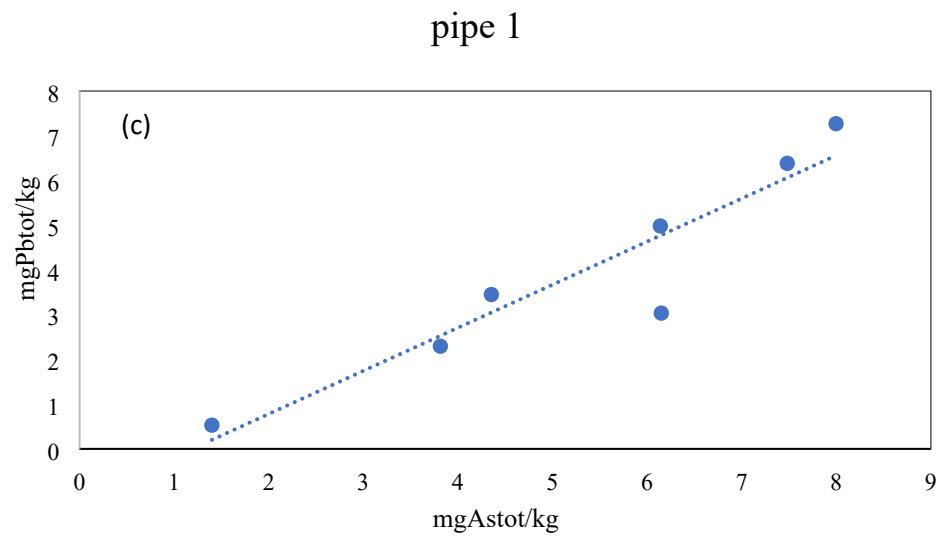

Figure S6. The linear co-release of (a) Fe and As, (b) Fe and Al and (c) Pb and As in pipe 1.

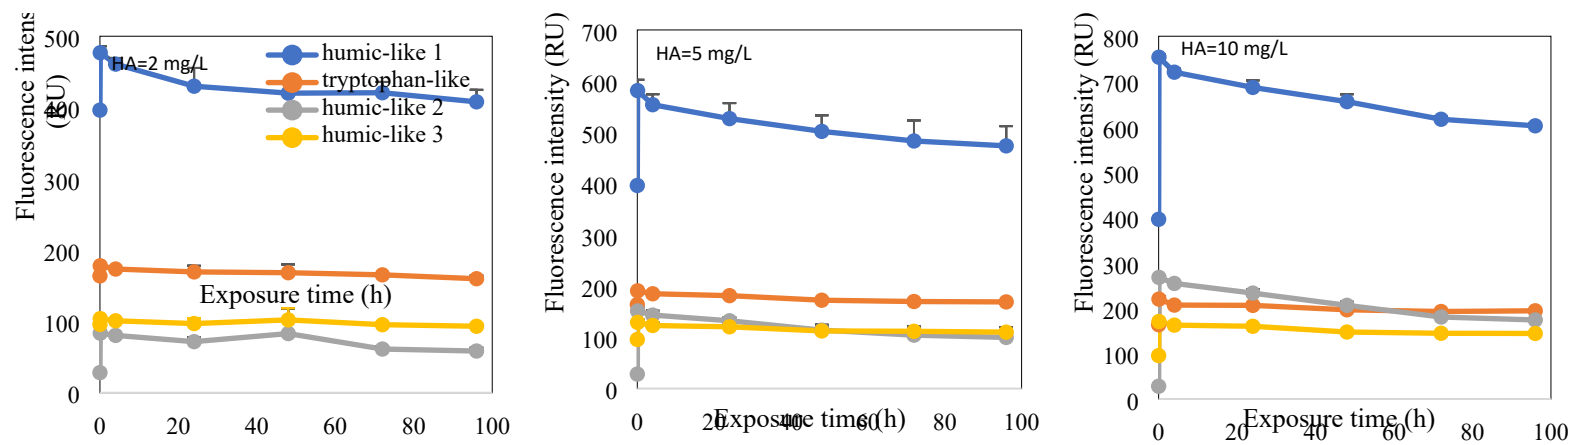

Figure S7. PARAFAC components intensities during the experiment with pipe scale 1 (after addition of HA).

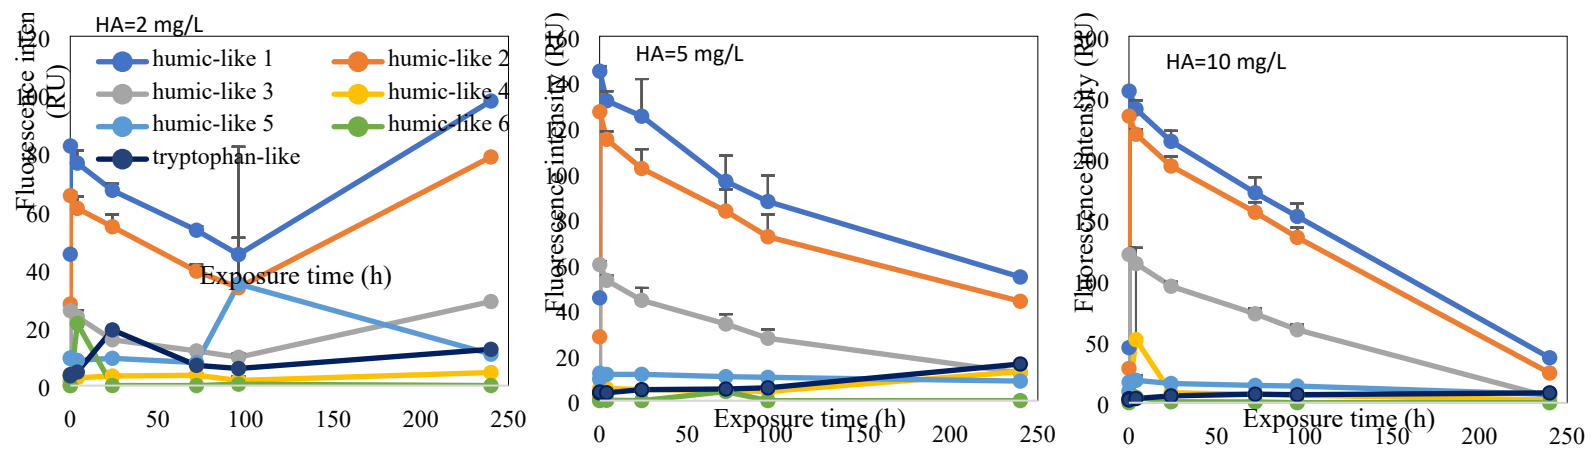

Figure S8. PARAFAC components intensities during the experiment with pipe scale 2 (after addition of HA).

**Experiment under stagnation water conditions**

- Fe, Al, Mn release, Pb and As precipitation
- Predominance of humic substances
- Stable and low THAA concentrations
- PCCA analysis – group 1: Fe, Pb, As – co-existence and co-release of these metals

**Pipe 1 – groundwater with higher As concentrations**

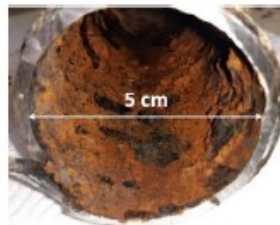

**Experiment under stagnation water conditions (addition of HA)**

- The greatest influence on the release of Fe, Al and Pb
- HA concentrations were independent of the quantity of As, however they induced its release

**Experiment under stagnation water conditions**

- Fe, Mn release, Al precipitation
- Presence of humic and protein substances
- Higher THAA concentrations which increased marginally
- PCCA analysis – group 2: Fe, Al, Zn

**Pipe 2 – surface water – higher content of protein-like OM**

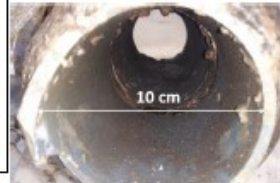

**Experiment under stagnation water conditions (addition of HA)**

- The greatest influence on the release of Fe
- The differences in HA concentrations least affected Mn concentrations
- The addition of HA caused the release of all monitored metals

**Experiment under stagnation water conditions**

- Fe, Mn, Pb release, Al precipitation
- Only Mn reached quasi-equilibrium over the experimental time course
- Mn in this pipe has the highest tendency to be released - potential problem at the end of the network
- Similar increasing concentration trend between Mn and  $SO_4$  ions
- Presence of humic and protein substances
- Stable and low TTHM and THAA concentrations
- PCCA analysis – group 3: Mn,  $SO_4$  ions

**Pipe 3 – brackish water – higher Mn concentration**

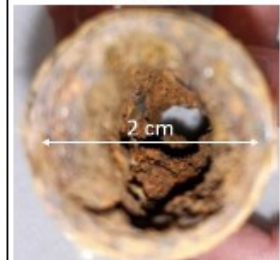

Figure S9. Summary of the major findings under stagnant conditions with and without addition of HA. Note the conditions for each pipe were as follows: pipe 1 was in contact with groundwater with higher As concentrations, pipe 2 was in contact with surface water with higher contents of protein-like OM, and pipe 3 was in contact with brackish water with higher Mn concentrations.
